# Supplementary material
Source: MDPI journal article supplement (https://www.mdpi.com/2313-0105/10/1/35)
Supplement: s1 [file s1]

Supplementary material

**Bismuth Nanoparticles Encapsulated in a Porous Carbon  
Skeleton as Stable Chloride-Storage Electrodes for Seawater  
Desalination**

Xiaoqing Dong<sup>a</sup>, Ying Wang<sup>b</sup>, Qian Zou<sup>b</sup>, Chaolin Li<sup>b, \*</sup>

<sup>a</sup> Department of Environmental Engineering Technology, Shenzhen Institute of  
Information Technology, Shenzhen 518172, China

<sup>b</sup> School of Civil and Environmental Engineering, Harbin Institute of Technology,  
Shenzhen, Shenzhen 518055, China

Corresponding author. Email: [lichaoлин@hit.edu.cn](mailto:lichaoлин@hit.edu.cn)

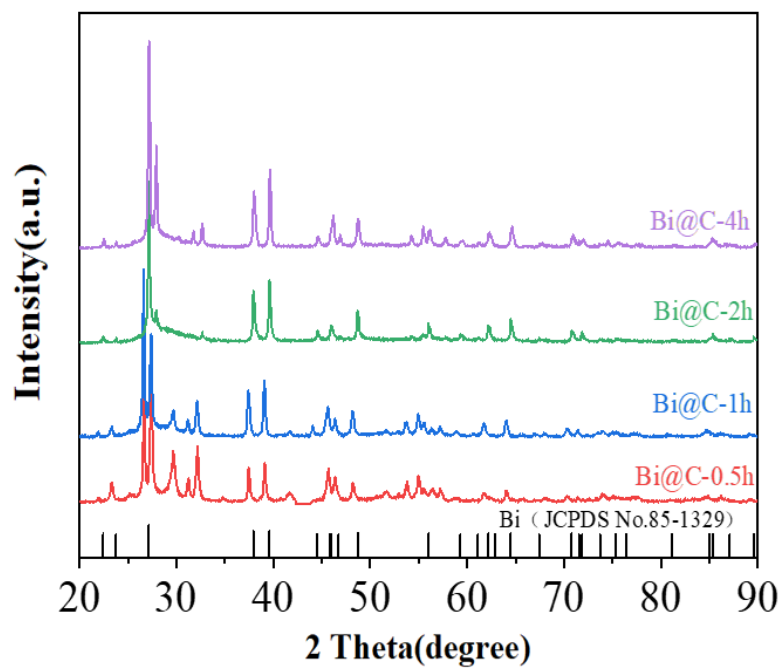

**Figure S1.** XRD pattern of materials at different annealing times

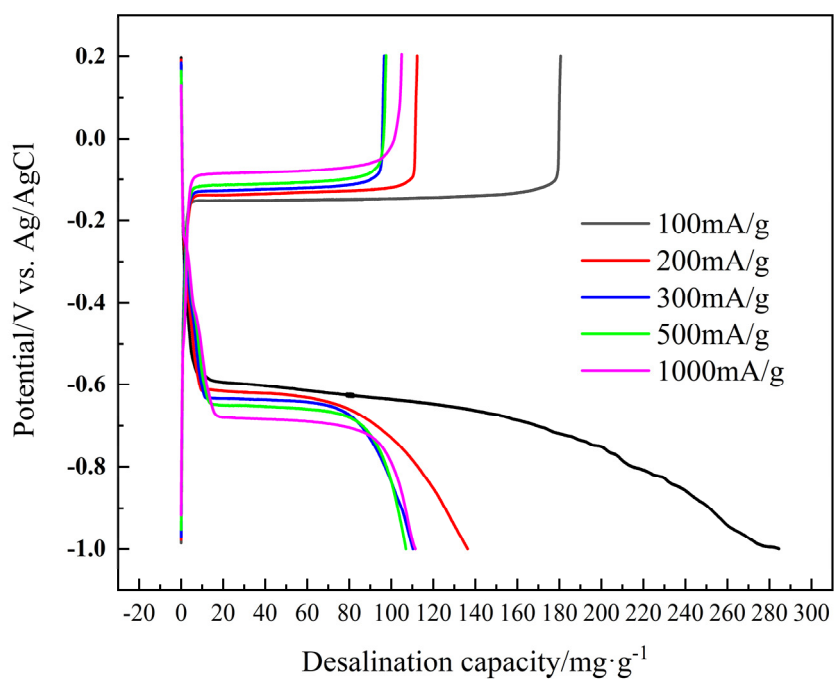

**Figure S2.** Charge and discharge curves at different current densities

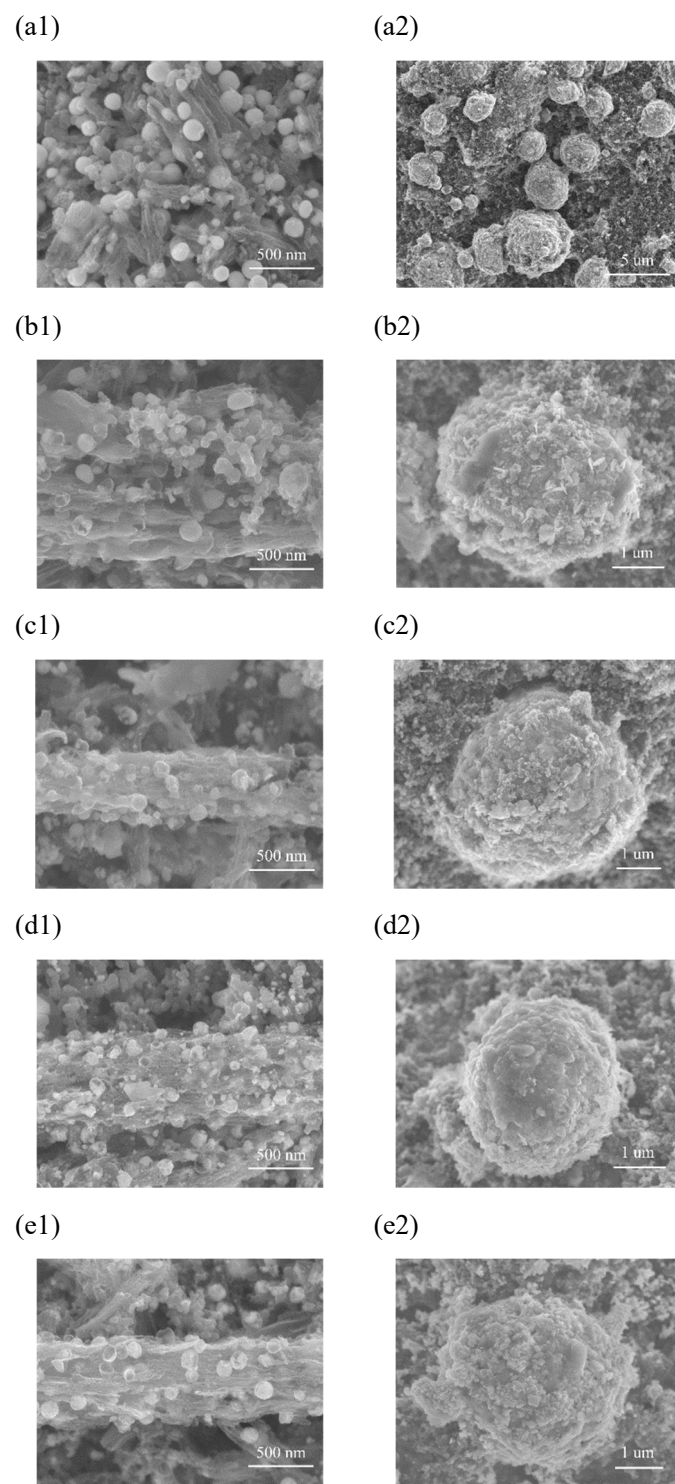

**Figure S3.** SEM image of demineralization process of Bi@C-2 h electrode and bare bismuth electrode

Bi@C-2 h electrode: (a1) before reaction; (b1) After the first storage of chlorine; (c1) After the first chlorination; (d1) After the fifth chlorination; (e1) After the 50th chlorination;

Bare bismuth electrode: (a2) before reaction; (b2) After the first storage of chlorine;  
(c2) after the first discharge of chlorine; (d2) After the fifth chlorination; (e2) After  
the 50th chlorination

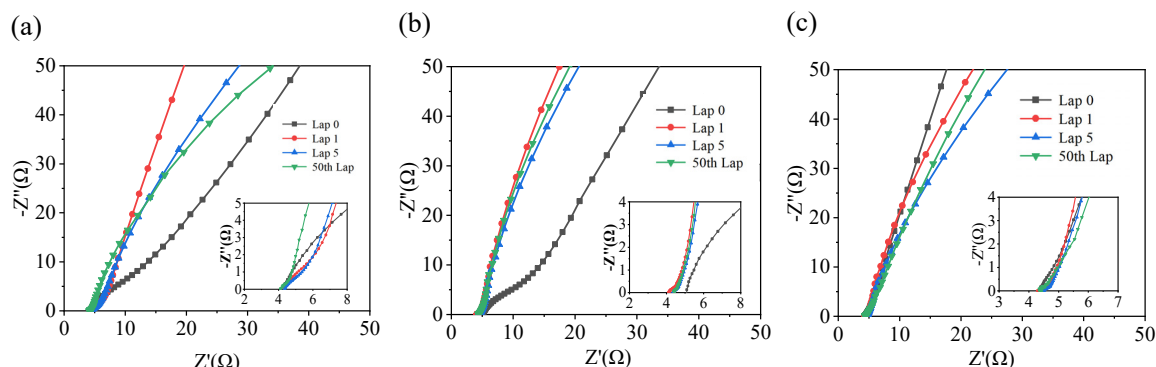

**Figure S4.** Impedance changes during the reaction of (a) bare bismuth electrode, (b) bismuth-carbon black electrode; (c) Bi@C electrode.

**Table S1.** Comparison of desalination capacity of Bi@C based DB with various carbon, pseudocapacitor and Faraday electrode materials reported in the literature.

| Electrode Material                                                | Cell | Power Mode | Desalination Voltage/Current  | Mass (mg) | C <sub>0</sub> (mg·L <sup>-1</sup> ) | SDC (mg·g <sup>-1</sup> ) | Ref |
|-------------------------------------------------------------------|------|------------|-------------------------------|-----------|--------------------------------------|---------------------------|-----|
| Porous Carbon                                                     | CDI  | C.V.       | 1.2 V/-                       | ~50       | 50                                   | 2.2                       | 1   |
|                                                                   |      | C.V.       | 1.2 V/-                       | ~50       | 50                                   | 6.6                       |     |
| Activate Carbon                                                   | MCDI | C.C.       | 1.2 V/2.0 mA                  | -         | 584.4                                | 4.2                       | 2   |
|                                                                   |      | C.C.       | 1.2 V/5.0 mA                  | -         | 584.4                                | 6.8                       |     |
|                                                                   |      | C.C.       | 1.2 V/9.0 mA                  | -         | 584.4                                | 10.0                      |     |
|                                                                   |      | C.C.       | 1.2 V/15.0 mA                 | -         | 584.4                                | 15.7                      |     |
| Na <sub>2</sub> FeP <sub>2</sub> O <sub>7</sub>                   | HCDI | C.V.       | 1.2 V/-                       | -         | 584.4                                | 30.2                      | 3   |
|                                                                   |      | C.V.       | 1.2 V/-                       | -         | 5844.0                               | 32.6                      |     |
|                                                                   | HCDI | C.C.       | 1.2 V/3.0 mA cm <sup>-2</sup> | -         | 584.4                                | 7.8                       |     |
|                                                                   |      | C.C.       | 1.2 V/2.0 mA cm <sup>-2</sup> | -         | 584.4                                | 12.8                      |     |
|                                                                   |      | C.C.       | 1.2 V/1.5 mA cm <sup>-2</sup> | -         | 584.4                                | 16.9                      |     |
|                                                                   |      | C.C.       | 1.2 V/1.0 mA cm <sup>-2</sup> | -         | 584.4                                | 24.0                      |     |
|                                                                   |      | C.C.       | 1.2 V/3.0 mA cm <sup>-2</sup> | -         | 5844.0                               | 20.6                      |     |
|                                                                   |      | C.C.       | 1.2 V/2.0 mA cm <sup>-2</sup> | -         | 5844.0                               | 26.2                      |     |
|                                                                   |      | C.C.       | 1.2 V/1.5 mA cm <sup>-2</sup> | -         | 5844.0                               | 29.0                      |     |
|                                                                   |      | C.C.       | 1.2 V/1.0 mA cm <sup>-2</sup> | -         | 5844.0                               | 34.0                      |     |
| Na <sub>3</sub> V <sub>2</sub> (PO <sub>4</sub> ) <sub>3</sub> @C | HCDI | C.V.       | 1.0 V/-                       | 10-20     | 5844.0                               | 137.2                     | 4   |

|                                                                              |      |      |                                |                       |         |        |    |
|------------------------------------------------------------------------------|------|------|--------------------------------|-----------------------|---------|--------|----|
| PNDIE                                                                        | HCDI | C.V. | 1.8 V/-                        | 200/100*              | 1000.0  | 54.20  | 5  |
| NaTi <sub>2</sub> (PO <sub>4</sub> ) <sub>3</sub> @C                         | HCDI | C.C. | 2.0 V/500 mA                   | 15 mg/cm <sup>2</sup> | 35064.0 | 146.8  | 6  |
| Nafion-coated<br>AC                                                          | RCDI | C.C. | 1.2 V/1.0 mA cm <sup>-2</sup>  |                       | 584.4   | 23.30  | 7  |
|                                                                              |      | C.C. | 1.2 V/1.25 mA cm <sup>-2</sup> |                       | 584.4   | 29.90  |    |
|                                                                              |      | C.C. | 1.2 V/1.5 mA cm <sup>-2</sup>  |                       | 584.4   | 35.00  |    |
|                                                                              |      | C.C. | 1.2 V/1.0 mA cm <sup>-2</sup>  |                       | 1168.8  | 19.10  |    |
|                                                                              |      | C.C. | 1.2 V/1.25 mA cm <sup>-2</sup> |                       | 1168.8  | 25.90  |    |
|                                                                              |      | C.C. | 1.2 V/1.5 mA cm <sup>-2</sup>  | 55.9                  | 1168.8  | 30.40  |    |
|                                                                              |      | C.C. | 1.2 V/2.0 mA cm <sup>-2</sup>  |                       | 1168.8  | 35.60  |    |
|                                                                              |      | C.C. | 1.2 V/1.0 mA cm <sup>-2</sup>  |                       | 2922.0  | 17.50  |    |
|                                                                              |      | C.C. | 1.2 V/1.25 mA cm <sup>-2</sup> |                       | 2922.0  | 29.10  |    |
|                                                                              |      | C.C. | 1.2 V/1.5 mA cm <sup>-2</sup>  |                       | 2922.0  | 36.70  |    |
|                                                                              |      | C.C. | 1.2 V/2.0 mA cm <sup>-2</sup>  |                       | 2922.0  | 41.10  |    |
|                                                                              |      | C.C. | 1.2 V/3.0 mA cm <sup>-2</sup>  |                       | 2922.0  | 44.50  |    |
| BiOCl   <br>Na <sub>0.44</sub> MnO <sub>2</sub>                              | DEDI | C.C. | 1.5 V /100 mA g <sup>-1</sup>  |                       | 760.0   | 68.50  | 8  |
|                                                                              |      | C.C. | 1.5 V /200 mA g <sup>-1</sup>  | 10.5/21.6*            | 760.0   | 37.5   |    |
|                                                                              |      | C.C. | 1.5 V /300 mA g <sup>-1</sup>  |                       | 760.0   | 22.40  |    |
|                                                                              |      | C.C. | 1.5 V /500 mA g <sup>-1</sup>  |                       | 760.0   | 9.20   |    |
| NaTi <sub>2</sub> (PO <sub>4</sub> ) <sub>3</sub>   <br>AgNPs                | DEDI | C.C. | 1.4 V /100 mA g <sup>-1</sup>  |                       | 2500.0  | 105.00 | 9  |
|                                                                              |      | C.C. | 1.4 V /200 mA g <sup>-1</sup>  | 10-20                 | 2500.0  | 77.00  |    |
|                                                                              |      | C.C. | 1.4 V /300 mA g <sup>-1</sup>  |                       | 2500.0  | 50.00  |    |
|                                                                              |      | C.C. | 1.4 V /500 mA g <sup>-1</sup>  |                       | 2500.0  | 26.00  |    |
|                                                                              |      | C.C. | 1.4 V /1000 mA g <sup>-1</sup> |                       | 2500.0  | 15.00  |    |
| Na <sub>3</sub> V <sub>2</sub> (PO <sub>4</sub> ) <sub>3</sub> @C<br>   AgCl | DEDI | C.C. | 1.4 V /100 mA g <sup>-1</sup>  | 10                    | 1000.0  | 98.00  | 10 |
|                                                                              |      | C.C. | 1.4 V /500 mA g <sup>-1</sup>  |                       | 1000.0  | 34.0   |    |
| Bi@C<br>(This work)                                                          | BD   | C.C. | 0.2 V /100 mA g <sup>-1</sup>  |                       | 35100.0 | 178.0  |    |
|                                                                              |      | C.C. | 0.2 V /200 mA g <sup>-1</sup>  |                       | 35100.0 | 145.7  |    |
|                                                                              |      | C.C. | 0.2 V /300 mA g <sup>-1</sup>  | 10                    | 35100.0 | 96.0   |    |
|                                                                              |      | C.C. | 0.2 V /500 mA g <sup>-1</sup>  |                       | 35100.0 | 108.4  |    |
|                                                                              |      | C.C. | 0.2 V /1000 mA g <sup>-1</sup> |                       | 35100.0 | 119.3  |    |

## Reference

1. M. Wang, X. T. Xu, Y. Liu, Y. J. Li, T. Lu and L. K. Pan, *Carbon*, 2016, **108**, 433-439.
2. T. Kim and J. Yoon, *RSC Adv.*, 2015, **5**, 1456-1461.
3. S. Kim, J. Lee, C. Kim and J. Yoon, *Electrochim. Acta*, 2016, **203**, 265-271.
4. J. Cao, Y. Wang, L. Wang, F. Yu and J. Ma, *Nano Lett.*, 2019, **19**, 823-828.
5. Y. Li, Z. Ding, J. Li, J. Li, T. Lu and L. Pan, *Desalination*, 2019, **469**, 114098.
6. Z. Guo, Y. Ma, X. Dong, M. Hou, Y. Wang and Y. Xia, *ChemSusChem*, 2018, **11**, 1741-1745.
7. J. Lee, K. Jo, J. Lee, S. P. Hong, S. Kim and J. Yoon, *ACS. Sustain. Chem. Eng.*, 2018, **6**, 10815-10822.
8. F. Chen, Y. Huang, L. Guo, L. Sun, Y. Wang and H. Y. Yang, *Energ. Environ. Sci.*, 2017, **10**, 2081-2089.
9. Y. Huang, F. Chen, L. Guo, J. Zhang, T. Chen and H. Y. Yang, *Desalination*, 2018, **451**, 241-247.
10. W. Zhao, L. Guo, M. Ding, Y. Huang and H. Y. Yang, *ACS Appl. Mater. Inter.*, 2018, **10**, 40540-40548.
